# Supplementary figures and images for: Genetic and biochemical analysis of the TLA1 gene in Chlamydomonas reinhardtii
Source: PubMed Central journal article supplement — Planta. 2009 Dec 15;231(3):729–40. doi: 10.1007/s00425-009-1083-3 (PMC2806527; doi:10.1007/s00425-009-1083-3), 2009-12-15

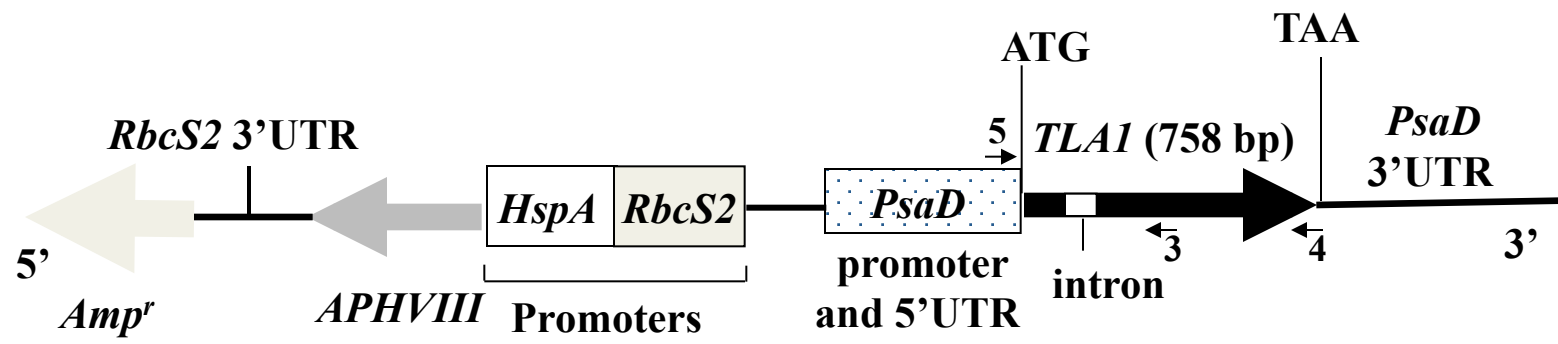

**Fig. 1S**

Supplement: 425_2009_1083_MOESM2_ESM.pdf [file 425_2009_1083_MOESM2_ESM.pdf]
